# Supplementary material for: Microbial Communities Associated with Farmed Genypterus chilensis: Detection in Water Prior to Bacterial Outbreaks Using Culturing and High-Throughput Sequencing
Source: PubMed Central journal article supplement (PMC7341507; doi:10.3390/ani10061055), 2020-06-18
Supplement: animals-10-01055-s001.pdf [file animals-10-01055-s001.pdf]

**Supplementary Table 1. Antibiotic susceptibility of the isolates**

UB, Flumequine (>30mm: Wild type; <30mm: Non-Wild type); FFC, Florfenicol (>27mm: Wild type; <26mm: Non-Wild type); OA, Oxolinic acid (>30: Susceptible; 25-25: Intermediate; <24: Resistant); OX-T, Oxytetracycline (>28: Susceptible; 22-27: Intermediate; <21: Resistant); ENR, Enrofloxacin (>30: Susceptible; 25-25: Intermediate; <24: Resistant); ERI, Erythromycin (>14mm: Wild type; <13mm: Non-Wild type).

| Sample |      | UB | FFC | OA | OX-T | ENR | ERI |
|--------|------|----|-----|----|------|-----|-----|
| F1 Mar | Q24  | 52 | 41  | 47 | 44   | 54  | 49  |
|        | Q25  | 48 | 40  | 50 | 47   | 57  | 46  |
|        | Q27  | 43 | 38  | 45 | 33   | 48  | 30  |
| F1 Jun | Q63  | 34 | 41  | 30 | 41   | 35  | 21  |
|        | Q64  | 35 | 39  | 30 | 39   | 34  | 24  |
|        | Q65  | 33 | 35  | 29 | 34   | 31  | 21  |
|        | Q66  | 40 | 34  | 35 | 27   | 37  | 26  |
|        | Q67  | 37 | 34  | 32 | 35   | 32  | 14  |
|        | Q68  | 28 | 29  | 6  | 56   | 6   | 33  |
|        | Q69  | 38 | 33  | 33 | 26   | 28  | 26  |
| F1 Oct | Q77  | 49 | 48  | 42 | 48   | 43  | 31  |
| F1 Dec | Q101 | 60 | 60  | 60 | 60   | 60  | 60  |
|        | Q102 | 32 | 38  | 29 | 36   | 31  | 16  |
|        | Q103 | 35 | 38  | 30 | 37   | 33  | 18  |
|        | Q104 | 60 | 63  | 40 | 48   | 66  | 38  |
| F1 Apr | Q156 | 60 | 47  | 67 | 54   | 60  | 42  |
|        | Q157 | 52 | 47  | 51 | 40   | 50  | 39  |
|        | Q158 | 38 | 36  | 30 | 35   | 33  | 18  |
|        | Q165 | 45 | 35  | 37 | 29   | 39  | 30  |
|        | Q168 | 60 | 60  | 60 | 60   | 60  | 60  |
|        | Q160 | 38 | 36  | 28 | 28   | 41  | 6   |
| RA Mar | Q1   | 46 | 48  | 60 | 46   | 55  | 30  |
|        | Q2   | 58 | 46  | 50 | 41   | 56  | 45  |
|        | Q3   | 35 | 44  | 38 | 45   | 40  | 25  |
| R Mar  | Q12  | 36 | 54  | 41 | 40   | 53  | 6   |
|        | Q14  | 51 | 41  | 38 | 37   | 46  | 26  |
|        | Q15  | 30 | 25  | 27 | 26   | 30  | 16  |
|        | Q16  | 33 | 38  | 24 | 39   | 30  | 22  |
| RA Jun | Q59  | 56 | 41  | 47 | 34   | 51  | 42  |
|        | Q60  | 42 | 31  | 33 | 26   | 38  | 27  |
|        | Q61  | 53 | 50  | 46 | 49   | 59  | 73  |
|        | Q62  | 35 | 33  | 33 | 29   | 29  | 20  |
| RA Oct | Q70  | 33 | 37  | 29 | 35   | 35  | 19  |
|        | Q71  | 44 | 35  | 37 | 29   | 39  | 30  |
|        | Q72  | 42 | 36  | 32 | 29   | 37  | 28  |
|        | Q73  | 39 | 35  | 40 | 37   | 35  | 38  |
|        | Q74  | 28 | 36  | 35 | 36   | 38  | 36  |
|        | Q75  | 60 | 60  | 60 | 60   | 60  | 60  |
| R Oct  | Q76  | 31 | 34  | 30 | 27   | 31  | 28  |
| R Dec  | Q94  | 58 | 44  | 54 | 43   | 56  | 32  |
|        | Q95  | 41 | 39  | 36 | 35   | 37  | 19  |
|        | Q96  | 55 | 50  | 48 | 43   | 44  | 28  |
|        | Q97  | 60 | 60  | 60 | 60   | 60  | 60  |
|        | Q98  | 55 | 43  | 59 | 60   | 48  | 20  |
| R Apr  | Q151 | 41 | 34  | 36 | 32   | 35  | 18  |
|        | Q152 | 35 | 34  | 33 | 35   | 31  | 12  |
|        | Q153 | 44 | 35  | 34 | 32   | 39  | 15  |
|        | Q155 | 33 | 33  | 27 | 31   | 27  | 14  |
| N Mar  | Q38  | 33 | 31  | 28 | 30   | 27  | 15  |
|        | Q39  | 65 | 43  | 47 | 40   | 62  | 26  |
|        | Q40  | 49 | 40  | 45 | 43   | 70  | 59  |

**Supplementary Table 2.** Number of sequences per sample retained or removed by MED analysis.

| <b>Sample</b>   | <b>Retained</b> | <b>Removed by -M<sup>a</sup></b> | <b>Removed by -V<sup>b</sup></b> |
|-----------------|-----------------|----------------------------------|----------------------------------|
| F1J             | 99919           | 10644                            | 4038                             |
| F1A             | 39920           | 6460                             | 2027                             |
| F1O             | 52774           | 9477                             | 2849                             |
| F1M             | 62474           | 15589                            | 5838                             |
| F1Di            | 16984           | 3485                             | 1159                             |
| RAM             | 51062           | 10973                            | 3935                             |
| RAJ             | 33895           | 11374                            | 3463                             |
| RA              | 42486           | 7378                             | 2641                             |
| RM              | 77082           | 17740                            | 6354                             |
| RO              | 30973           | 7410                             | 2465                             |
| RD <sub>i</sub> | 64552           | 7605                             | 2666                             |
| NM              | 33786           | 12490                            | 3777                             |

<sup>a</sup>Sequences in nodes removed because total abundance of node was below minimum threshold

<sup>b</sup>Sequences removed because nucleotide variability was too high to allow placement within a node

**Supplementary Table 3.** Coverage estimates for MED nodes within all taxa, *Tenacibaculum*, and *Vibrio*.

| Sample          | Coverage <sup>a</sup> |                      |               |
|-----------------|-----------------------|----------------------|---------------|
|                 | all taxa              | <i>Tenacibaculum</i> | <i>Vibrio</i> |
| F1M             | >0.999                | 0.975                | 0.959         |
| F1J             | 0.999                 | 0.966                | 0.995         |
| F1O             | 0.999                 | 0.988                | 0.908         |
| F1Di            | 0.996                 | 0.947                | 0.909         |
| F1A             | 0.999                 | 0.997                | 0.944         |
| RAM             | 0.999                 | 0.950                | 0.997         |
| RM              | >0.999                | 0.969                | 0.997         |
| RAJ             | 0.999                 | 0.953                | 0.942         |
| RO              | 0.998                 | 0.975                | 0.913         |
| RD <sub>i</sub> | 0.999                 | 0.954                | 0.978         |
| RA              | 0.999                 | 0.994                | 0.971         |
| NM              | 0.999                 | 0.950                | 0.969         |

<sup>a</sup>Coverage estimates were calculated with the *entropart* package in R using the Chao estimator.

**Supplementary Table 4.** Shannon Diversity index for MED nodes within all taxa, *Tenacibaculum*, and *Vibrio*

| Sample          | Shannon Diversity <sup>a</sup> |                      |               |
|-----------------|--------------------------------|----------------------|---------------|
|                 | all taxa                       | <i>Tenacibaculum</i> | <i>Vibrio</i> |
| F1M             | 4.85                           | 4.22                 | 2.37          |
| F1J             | 2.72                           | 3.21                 | 1.44          |
| F1O             | 4.83                           | 1.80                 | 3.04          |
| F1Di            | 4.94                           | 3.29                 | 2.71          |
| F1A             | 4.22                           | 2.23                 | 2.44          |
| RAM             | 5.09                           | 4.00                 | 2.56          |
| RM              | 5.07                           | 4.20                 | 2.58          |
| RAJ             | 5.1                            | 3.96                 | 2.55          |
| RO              | 4.55                           | 3.40                 | 2.75          |
| RD <sub>i</sub> | 4.58                           | 3.23                 | 3.04          |
| RA              | 5.24                           | 2.66                 | 2.95          |
| NM              | 4.99                           | 3.94                 | 2.38          |

<sup>a</sup>Shannon diversity was calculated using the *vegan* package in R.
